# Supplementary material
Source: PubMed Central journal article supplement (PMC3594285)
Supplement: rna-10-267-s01.pdf [file rna-10-267-s01.pdf]

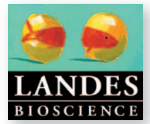

## **Supplemental Material to:**

**Fabienne Mauxion, Brigitte Prève and Bertrand Séraphin**

**C2ORF29/CNOT11 and CNOT10 form a new module of the  
CCR4-NOT complex**

**2012; 10(2)**

**<http://dx.doi.org/10.4161/rna.23065>**

**[www.landesbioscience.com/journals/rnabiology/article/23065/](http://www.landesbioscience.com/journals/rnabiology/article/23065/)**

**Supplementary data for:**

**C2ORF29/CNOT11 and CNOT10 form a new module of the CCR4-NOT  
complex**

Fabienne Mauxion, Brigitte Prève, and Bertrand Séraphin

Equipe Labellisée La Ligue, Institut de Génétique et de Biologie Moléculaire et Cellulaire (IGBMC),  
Centre National de Recherche Scientifique (CNRS) UMR 7104/Institut National de Santé et de  
Recherche Médicale (INSERM) U964/Université de Strasbourg, 67404 Illkirch, France

**Supplementary Table 1: Identification of the proteins associated with CNOT7-TAP by mass spectrometry.**

For each bands visible in Fig.1, the proteins identified with more than 2 unique peptides are indicated. The numbers of total peptides and of unique peptides obtained in the mass spectrometric analysis are indicated as well as the name of the yeast CCR4-NOT orthologue. NR: not relevant; X: no homologue in the yeast genome.

| Band number | Protein         | Total peptides | Unique peptides | Yeast orthologue |
|-------------|-----------------|----------------|-----------------|------------------|
| 1           | CNOT1           | 74             | 37              | Not1             |
| 2           | CNOT1           | 54             | 31              | Not1             |
| 3           | CNOT1           | 59             | 33              | Not1             |
| 4           | CNOT3           | 7              | 5               | Not3/Not5        |
| 5           | CNOT10          | 21             | 11              | X                |
| 6           | CNOT2           | 26             | 9               | Not2             |
|             | CNOT6L          | 15             | 8               | Ccr4             |
|             | CNOT6           | 4              | 3               | Ccr4             |
| 7           | CNOT2           | 12             | 6               | Not2             |
|             | CNOT6           | 9              | 6               | Ccr4             |
|             | CNOT6L          | 6              | 4               | Ccr4             |
| 8           | $\beta$ tubulin | 7              | 6               | NR               |
| 9           | CNOT2           | 10             | 5               | Not2             |
|             | C2ORF29         | 4              | 3               | X                |
| 10          | CNOT7           | 26             | 7               | Caf1             |
|             | CAPZA1          | 7              | 4               | NR               |
| 11          | CNOT9/RQCD1     | 30             | 13              | Caf40            |

**A**

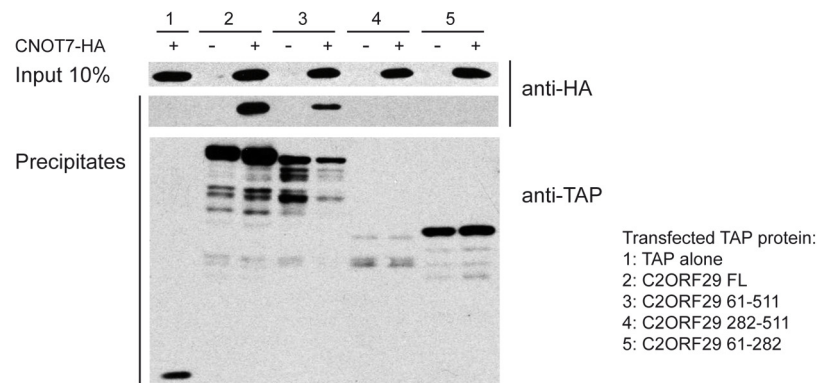

**B**

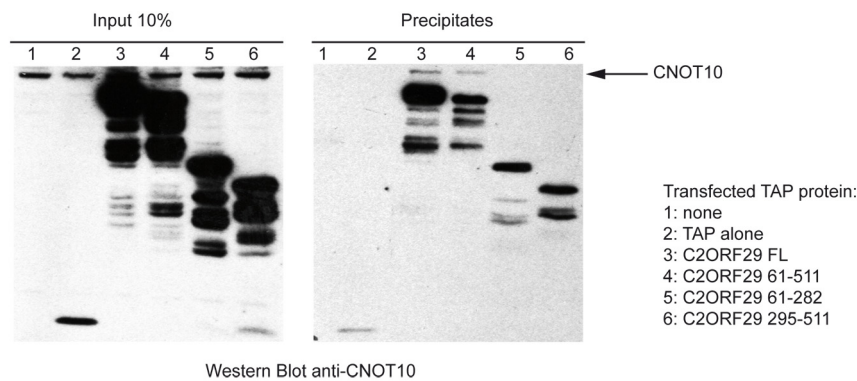

**Supplementary Figure 1: The C-terminal conserved region of C2ORF29 is not sufficient for its association with the CCR4-NOT complex**

(A) HEK293 cells were co-transfected with plasmids expressing the TAP tag alone, the full-length C2ORF29-TAP protein, or deletion derivatives thereof, and a plasmid expressing CNOT7-HA or the empty pCIneo vector. Cells were lysed and the TAP-tagged proteins were precipitated with IgG Sepharose beads. Co-precipitation of CNOT7-HA was analyzed by western blotting. Note that the C2ORF29-TAP protein corresponding to amino acids 282 to 511, which corresponds in sequence alignment to the length of the *Dm* C2ORF29 protein, is not well expressed in human cells.

(B) HEK293 cells were transfected with plasmids expressing the TAP tag alone, the full-length C2ORF29-TAP protein, or deletion derivatives thereof. After cell lysis, the TAP-tagged proteins were precipitated with IgG sepharose. Co-precipitation of CNOT10 was visualized by western blotting with a rabbit antiserum directed against endogenous CNOT10. Note that the rabbit antiserum recognizes also the TAP-tagged proteins due to the presence of a protein A domain in the tag.

**Supplementary Table 2: Plasmids**

| Plasmid    | Vector                           | Insert                                                                                  | Comments                                                                                                                 |
|------------|----------------------------------|-----------------------------------------------------------------------------------------|--------------------------------------------------------------------------------------------------------------------------|
| GST-CAF1   | pGEX-2T                          | Encodes a GST-murine CNOT7 fusion protein                                               | Kind gift from Dr. L. Corbo (Centre Léon Bérard, Lyon, France), our stock pBS2190                                        |
| pBS2567    | pCIneo (Promega) cut XhoI-XmaI   | Encodes a murine CNOT7-TAP fusion protein                                               | PCR cut XhoI-NcoI amplified with OBS800 and OBS801 from pBS2190 and NcoI-XmaI fragment from plasmid pBS1479 <sup>1</sup> |
| pBS3620    | pCIneo (Promega) cut XhoI-XmaI   | Encodes the TAP tag                                                                     | PCR cut XhoI-XmaI amplified with OBS3715 and OBS3716 from pBS1479 <sup>1</sup>                                           |
| MGC5752134 | pCMV-SPORT6                      | Human C2ORF29 cDNA                                                                      | From the Mammalian Gene Collection <sup>2</sup> , our stock pBS3424                                                      |
| pBS3554    | pCIneo (Promega) cut XhoI-XmaI   | Encodes a human C2ORF29-TAP fusion protein                                              | PCR cut XhoI-NcoI amplified with OBS3521 and OBS3522 from pBS3424 and NcoI-XmaI fragment from pBS1479                    |
| pBS2594    | pCIneo cut XhoI-XmaI             | Encodes a murine CNOT7-HA protein                                                       | XhoI-NcoI fragment from pBS2567 and AflIII-XmaI HA tag                                                                   |
| pBS2560    | pEGFP-C1 (CLONTECH)              | Encodes a GFP-human CNOT6 fusion protein                                                | described in <sup>3</sup>                                                                                                |
| pB27       |                                  | Encodes a LexA Binding Domain                                                           | From Hybrigenics, our stock pBS4411                                                                                      |
| pP6        |                                  | Encodes a Gal4 Activating Domain                                                        | From Hybrigenics, our stock pBS4403                                                                                      |
| MGC5266600 | pBluescriptR                     | Human CNOT1 cDNA                                                                        | From the Mammalian Gene Collection <sup>2</sup> , our stock pBS3422                                                      |
| MGC3955575 | pOTB7                            | Human CNOT10 cDNA                                                                       | From the Mammalian Gene Collection <sup>2</sup> , our stock pBS3430                                                      |
| pBS4568    | pB27 (Hybrigenics) cut SfiI      | Encodes a LexA Binding Domain - human C2ORF29 (amino acids 61 to 511) fusion protein    | PCR cut SfiI amplified with OBS5380 and OBS5381 from pBS3424                                                             |
| pBS4569    | pB27 (Hybrigenics) cut SfiI      | Encodes a LexA Binding Domain - human CNOT10 protein                                    | PCR cut SfiI amplified with OBS5382 and OBS5383 from pBS3430                                                             |
| pBS4625    | pB27 (Hybrigenics) cut SfiI      | Encodes a LexA Binding Domain – human CNOT1 (amino acids 1 to 331) protein              | PCR cut SfiI amplified with OBS5376 and OBS5604 from pBS3422                                                             |
| pBS4570    | pP6 (Hybrigenics) cut NotI-BamHI | Encodes a Gal4 Activating Domain – human C2ORF29 (amino acids 61 to 511) fusion protein | PCR cut NotI-BamHI amplified with OBS5386 and OBS5387 from pBS3424                                                       |
| pBS4571    | pP6 (Hybrigenics) cut NotI-BamHI | Encodes a Gal4 Activating Domain – human CNOT10 fusion protein                          | PCR cut NotI-BamHI amplified with OBS5384 and OBS5385 from pBS3430                                                       |

|          |                                        |                                                                                               |                                                                                                                                              |
|----------|----------------------------------------|-----------------------------------------------------------------------------------------------|----------------------------------------------------------------------------------------------------------------------------------------------|
| pBS4626  | pP6<br>(Hybrigenics) cut<br>NotI-BamHI | Encodes a Gal4 Activating<br>Domain – human CNOT1<br>(amino acids 1 to 240)<br>fusion protein | PCR cut NotI-BamHI amplified with<br>OBS5607 and OBS5608 from pBS3422                                                                        |
| pBS4409  | pP6<br>(Hybrigenics) cut<br>SfiI       | Encodes a Gal4 Activating<br>Domain – human CNOT7<br>fusion protein                           | From Hybrigenics                                                                                                                             |
| pTet-BBB |                                        | Transcribes a $\beta$ -globin<br>mRNA reporter                                                | Kindly provided by Dr. Ann-Bin Shyu<br>(The University of Texas Medical<br>School, Houston, Texas, USA), <sup>4</sup> , our<br>stock pBS2894 |
| pBS3809  | pCIneo<br>(Promega)<br>cut NheI-XmaI   | Encodes a human C2ORF29<br>amino acids 61 to 511-TAP<br>fusion protein                        | PCR cut NheI-NcoI amplified with<br>OBS4004 and OBS3522 from pBS3424<br>and NcoI-XmaI fragment from<br>pBS1479                               |
| pBS3811  | pCIneo<br>(Promega)<br>cut NheI-XmaI   | Encodes a human C2ORF29<br>amino acids 61 to 282-TAP<br>fusion protein                        | PCR cut NheI-NcoI amplified with<br>OBS4004 and OBS4006 from pBS3424<br>and NcoI-XmaI fragment from<br>pBS1479                               |
| pBS3810  | pCIneo<br>(Promega)<br>cut NheI-XmaI   | Encodes a human C2ORF29<br>amino acids 282 to 511-<br>TAP fusion protein                      | PCR cut NheI-NcoI amplified with<br>OBS4005 and OBS3522 from pBS3424<br>and NcoI-XmaI fragment from<br>pBS1479                               |
| pBS4134  | pCIneo<br>(Promega)<br>cut NheI-XmaI   | Encodes a human C2ORF29<br>amino acids 295 to 511-<br>TAP fusion protein                      | PCR cut NheI-ClaI amplified with<br>OBS4670 and OBS3522 from pBS3424<br>and ClaI-XmaI fragment from pBS3554                                  |

**Supplementary Table 3: Sequences of DNA and RNA oligonucleotides**

| Name    | Sequence                                       |
|---------|------------------------------------------------|
| R2 RNA  | 5'P-CCUAUAGUGAGUCGUAUAAA-ddC3'                 |
| OBS800  | CCGCTCGAGTATGCCAGCAGCAACCGTAGATC               |
| OBS801  | TTGCCCATGGCTGACTGCTTGCTGGCTTCCT                |
| OBS3715 | CTGCTCGAGACCATGGAAAAGAGAAGATGGAAA              |
| OBS3716 | CTGCCCGGGTCAGGTTGACTTCCCCGCGGA                 |
| OBS3521 | ATTGCTAGCGGATCCAGGTTGATGCCCGGCGGAGG            |
| OBS3522 | TTGTCTAGAGCCATGGCTTTTGACATTTTCGGTCTCAG         |
| OBS4004 | ATTGCTAGCGGATCCAGGTTGATGAGCTTGACCCCGAAGG       |
| OBS4005 | ATTGCTAGCGGATCCAGGTTGATGTTTATTCGTCCACCGCCTC    |
| OBS4006 | TTGTCTAGAGCCATGGCTGGTCGAAAATGGCTTTCAAT         |
| OBS4069 | AATTCCTCCTCAGGTGCAG                            |
| OBS4420 | CTGGAATTCGCGGTTAAATTAATACGACTCACTATAGGT        |
| OBS4437 | CTGGAATTCGCGGTTAAA                             |
| OBS4670 | ATTGCTAGCGGATCCAGGTGGATGGAGGATGAACTTGCTTGGCTAA |
| OBS5376 | ATCGGCCGGACGGGCCATGAATCTTGACTCGCTCTCG          |
| OBS5380 | ATCGGCCGGACGGGCCATGAGCTTGACCCCGAAGGAG          |
| OBS5381 | ATCGGCCCCAGTGGCCCTTATTTTGACATTTTCGGTCTCAGAAG   |
| OBS5382 | ATCGGCCGGACGGGCCATGGCTGCAGACAAGCCT             |
| OBS5383 | ATCGGCCCCAGTGGCCCTTACTTTCTCTGCACAGTGGTGA       |
| OBS5384 | ATCGCGGCCGCCATGGCTGCAGACAAGCCT                 |
| OBS5385 | ATCGGATCCTTACTTTCTCTGCACAGTGGTGA               |
| OBS5386 | ATCGCGGCCGCCATGAGCTTGACCCCGAAGGAG              |

|         |                                             |
|---------|---------------------------------------------|
| OBS5387 | ATCGGATCCTTATTTTGACATTTTCGGTCTCAGAAG        |
| OBS5604 | ATCGGCCCCAGTGGCCCTTATGCTCCATCACTTTTATCTTTCC |
| OBS5607 | ATCGCGGCCGCCATGAATCTTGACTCGCTCTCG           |
| OBS5608 | ATCGGATCCTTATGCTCCATCACTTTTATCTTTCC         |



**Supplementary Table 4: Sequences of siRNAs**

| siRNA target | siRNA Sequences                                                                                  |
|--------------|--------------------------------------------------------------------------------------------------|
| CNOT1        | CUAUAAAAGAGGGAACGAGA<br>GGCCAAAUUGUCUCGAAUA<br>CCAGAAACUUUGGCGACAA<br>CAAGUUAGCACUAUGGUAA        |
| CNOT2        | CAUGAGCAGUUCAGGGUUA<br>GAUUGGACCUUCAGAUUU<br>UAACCCAACUCCAUAUAUA<br>GAAGAACGAGUAUGGAUUA          |
| CNOT7        | CAGCUAGGACUGACAUAUA<br>GGAGAAUUCAGGAGCAAUG<br>UCAUAGCGGUUACGACUUU<br>GUUAGAGCUGGAACGGAUA         |
| CNOT8        | CCAUAGAUCUCCUUGCUGAA<br>AAUAUCAGCUUCUGCGGUG<br>GAGAAUAGCCAGGUUAUCU<br>UUUCGUAGUCCAUAAGAUU        |
| CNOT9        | CACCAGCCUUGGAGUUAUU<br>UGAAGCAUGUAGUGAGAUG<br>UGACAGCACACCAGUCUAA<br>CCUUUAUGUUUGCGAAUUA         |
| CNOT10       | UACGAGCUUAUAUCCAAAUGA<br>CAGGGAAGAACCCGAGTCGAA<br>GUGUACGUUACUAACCAAUAA<br>UUGGUCAAGGCUAUCUUCGUA |
| C2ORF29      | GGAUGAACUUGCUUGGCUA<br>GUGUGGAGAUCAAACGAAU<br>GGAAGUUGUAAAUCGACUA<br>AUUCAGUAGGAUACGAGAA         |

## **SUPPLEMENTARY REFERENCES**

1. Rigaut G, Shevchenko A, Rutz B, Wilm M, Mann M, Seraphin B. A generic protein purification method for protein complex characterization and proteome exploration. *Nat Biotechnol* 1999; 17:1030-2.
2. Temple G, Gerhard DS, Rasooly R, Feingold EA, Good PJ, Robinson C, et al. The completion of the Mammalian Gene Collection (MGC). *Genome Res* 2009; 19:2324-33.
3. Cougot N, Babajko S, Seraphin B. Cytoplasmic foci are sites of mRNA decay in human cells. *J Cell Biol* 2004; 165:31-40.
4. Xu N, Loflin P, Chen CY, Shyu AB. A broader role for AU-rich element-mediated mRNA turnover revealed by a new transcriptional pulse strategy. *Nucleic Acids Res* 1998; 26:558-65.
